# Supplementary material for: Retrospective Analysis of Wood Anatomical Traits Reveals a Recent Extension in Tree Cambial Activity in Two High-Elevation Conifers
Source: PubMed Central journal article supplement (PMC5420594; doi:10.3389/fpls.2017.00737), 2017-05-08

**Figure S1:** April-October daily temperature as recorded in 2001 (a) and 2008 (b) at the Cortina d'Ampezzo and Cinque Torri meteorological stations. Comparison (c) of the April-October daily temperature data recorded at the two stations for the period 1999-2012.

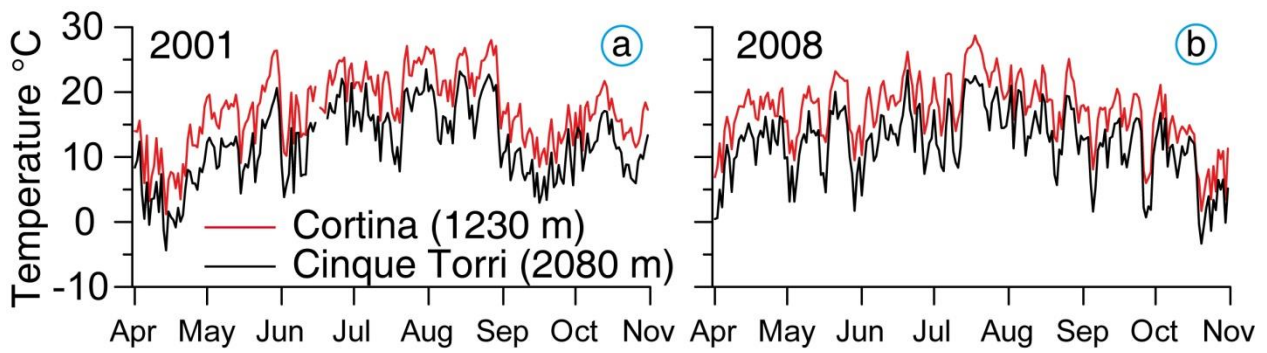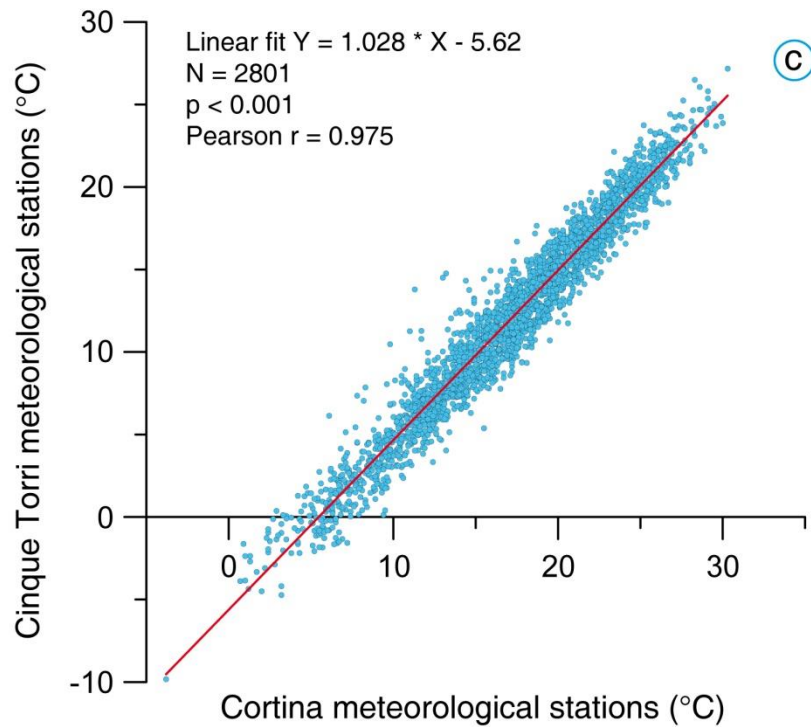

Supplement: Image_1.pdf [file Image_1.pdf]
