# Supplementary material for: Retrospective Analysis of Wood Anatomical Traits Reveals a Recent Extension in Tree Cambial Activity in Two High-Elevation Conifers
Source: PubMed Central journal article supplement (PMC5420594; doi:10.3389/fpls.2017.00737), 2017-05-08

**Figure S2** Course of the mean monthly temperature for the 30 coldest and warmest April-September years listed in Table S4.

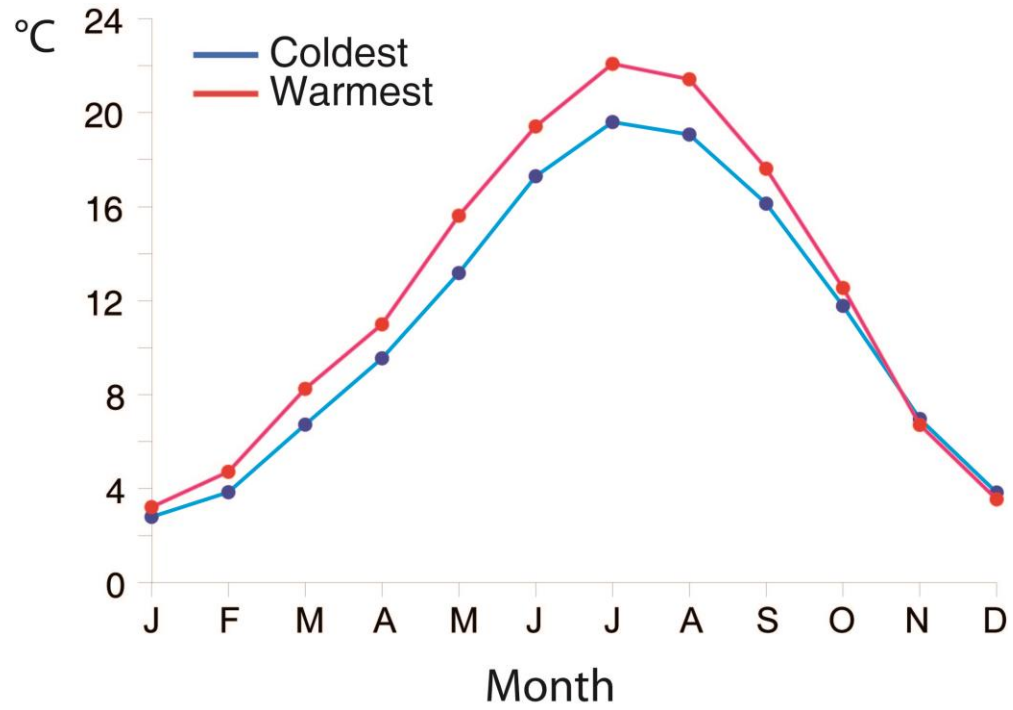

Supplement: Image_2.pdf [file Image_2.pdf]
